# Supplementary material
Source: Springer Nature journal article supplement (https://www.springermedizin.de/resource/supplementary/12913_2010_1404_MOESM6_ESM.pdf/9528066)
Supplement: MOESM6 [file 9528066]

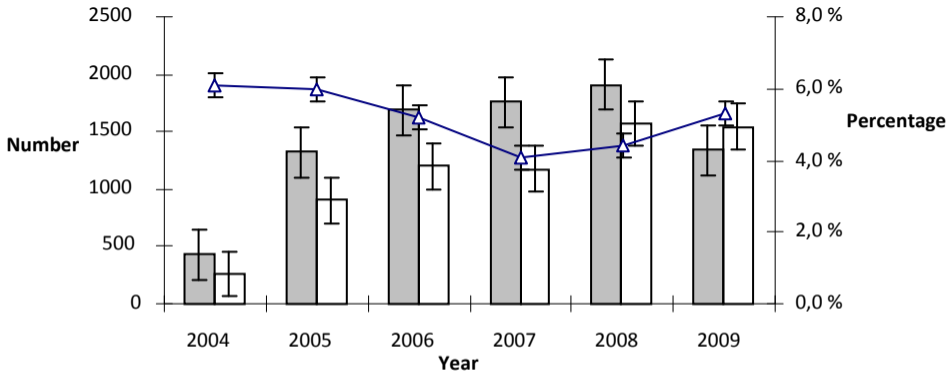

- Number of HIV positive women
- Number of partners tested for PMTCT
- ▲ Percentage of partner tested among women who tested for HIV

*The bar indicates the standard error of the estimate*
